# Supplementary material for: Probiotic and Triticale Silage Fermentation Potential of Pediococcus pentosaceus and Lactobacillus brevis and Their Impacts on Pathogenic Bacteria
Source: PubMed Central journal article supplement (PMC6780645; doi:10.3390/microorganisms7090318), 2019-09-04
Supplement: microorganisms-07-00318-s001.pdf [file microorganisms-07-00318-s001.pdf]

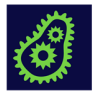

## Probiotic and *Triticale* Silage Fermentation potential of *Pediococcus pentosaceus* and *Lactobacillus brevis* and Their Impacts on pathogenic bacteria

Ilavenil Soundharrajan <sup>a†</sup>, Da Hye Kim<sup>2†</sup>, Palaniselvam Kuppusamy <sup>a</sup>, Karanan kuppusamy<sup>a</sup>

Hyun Jeong Lee <sup>c</sup>, Ki Choon Choi <sup>a\*</sup>

<sup>a</sup> Grassland and Forage division, National Institute of Animal Science, Rural Development Administration, Cheonan, South Korea-330-801.

<sup>b</sup>Center for Research on Environmental Disease, College of Medicine, University of Kentucky, 1095 VA Drive, Lexington, KY 40536 USA.

<sup>c</sup>Jangsu Agriculture Technology Center, Jangsu, Jeollabuk-do, 55640, South Korea

†They are contributed equally to this work

\* **Corresponding author.** Grassland and Forage division, National Institute of Animal Science, Rural Development Administration, Cheonan, South Korea-330-801. Tel.: +82-41-580-6752, Fax: +82-41-580-6779.

E-mail address: \* [choiwh@korea.kr](mailto:choiwh@korea.kr) [K.C. Choi]

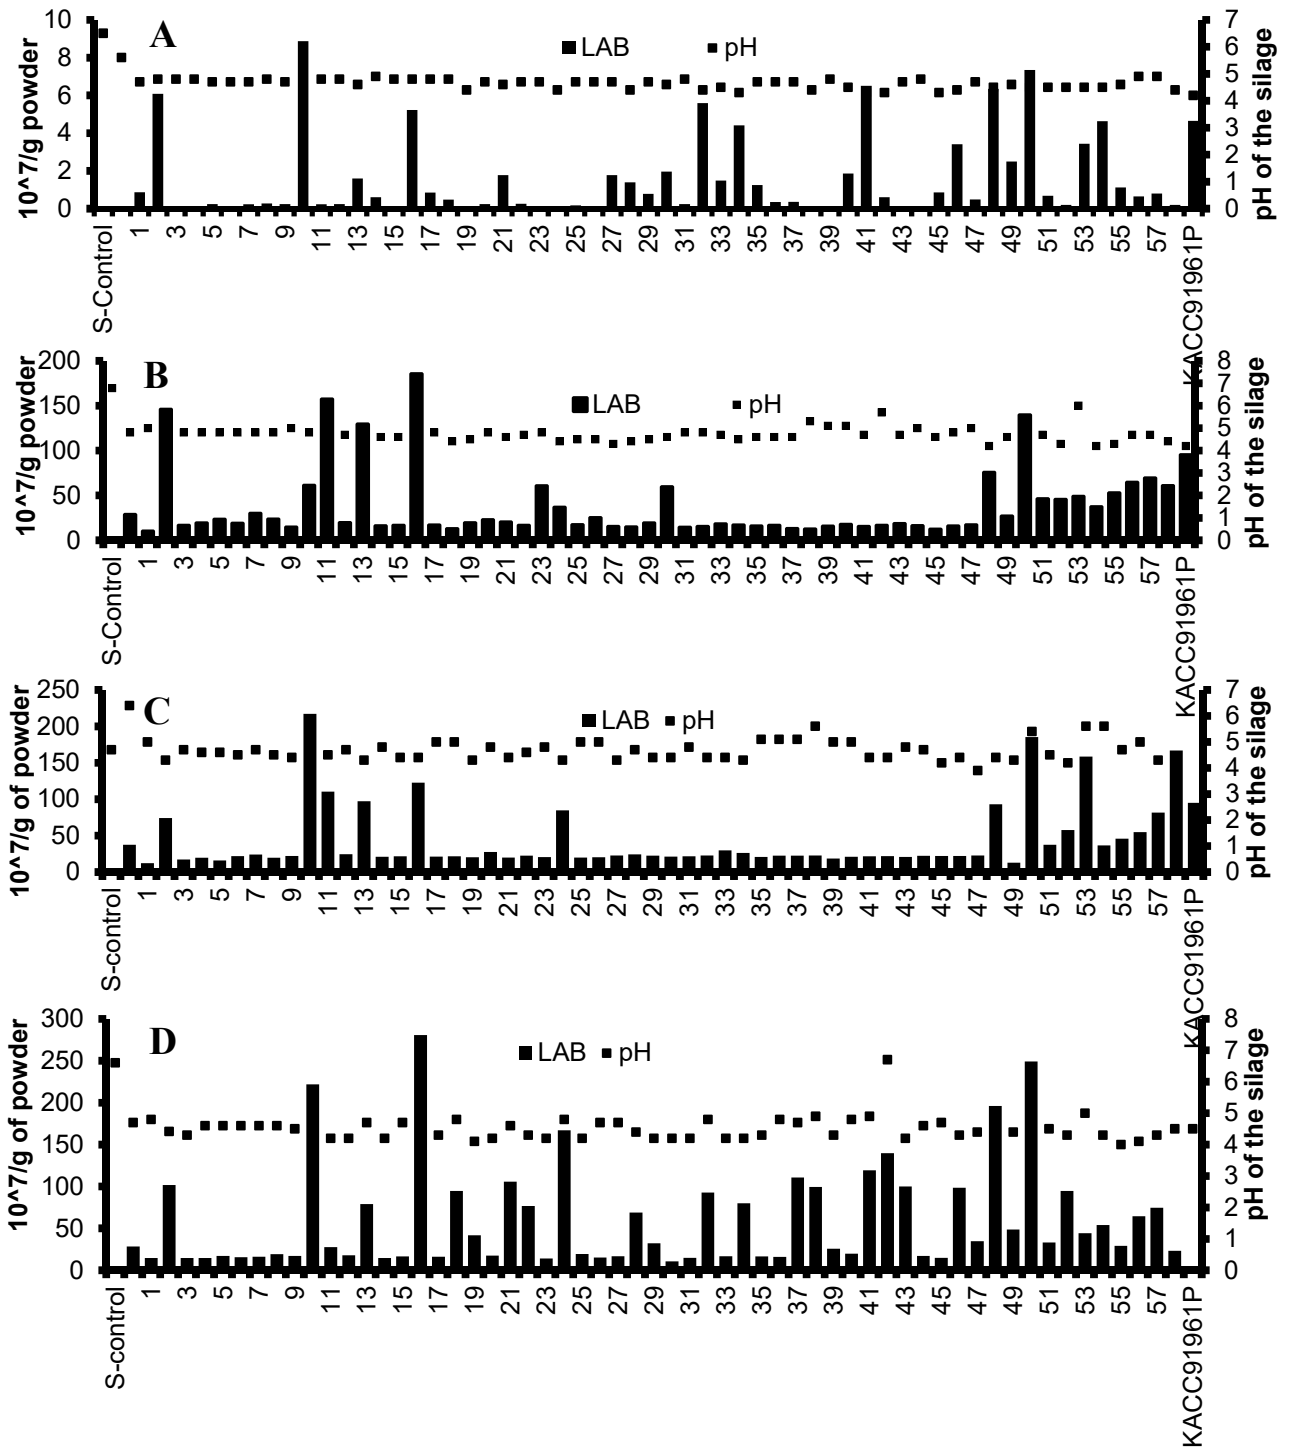

**Supplementary figure S1:** Effect of lactic acid bacteria on the fermentation of triticale silage. (A) microbial population and pH of the silage at 40% moisture; (B) microbial population and pH of the silage at 50% moisture; (C) microbial population and pH of the silage at 60% moisture; (D) microbial population and pH of the silage at 70% moisture. S- Control (Sterilized with Ethylene Oxide gas), Control – Without addition of LAB. LAB- lactic acid bacteria.
